# Supplementary material
Source: PubMed Central journal article supplement (PMC3529097)
Supplement: NIHMS420063-supplement-1_si_001.pdf [file NIHMS420063-supplement-1_si_001.pdf]

Supporting Information for

**His26 Protonation in Cytochrome c Triggers Microsecond  $\beta$ -sheet Formation and Heme Exposure: Implications for Apoptosis**

Gurusamy Balakrishnan,<sup>1</sup> Ying Hu,<sup>2</sup> and Thomas G. Spiro\*<sup>1</sup>

*Department of Chemistry, Princeton University, Princeton, NJ 08544, USA.*

\*Corresponding author's email: [spiro@chem.washington.edu](mailto:spiro@chem.washington.edu)

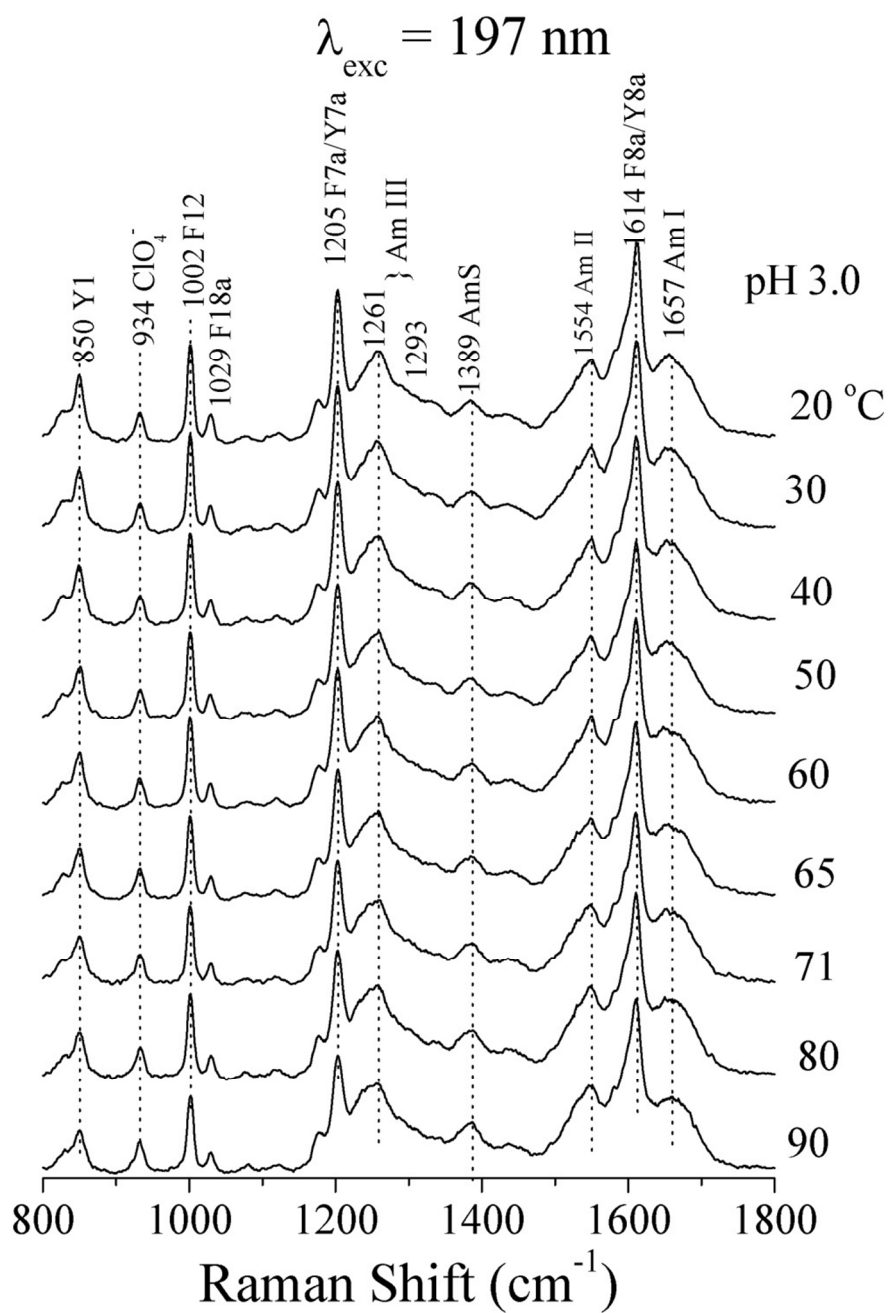

Figure S1. Temperature-dependent, 197-nm excited UVRR spectra of *hh* cyt c at pH 3.0, showing loss of intensity in the signals from backbone amide, Tyr and Phe bands. Assignments<sup>1,2</sup> are indicated in the top spectrum.

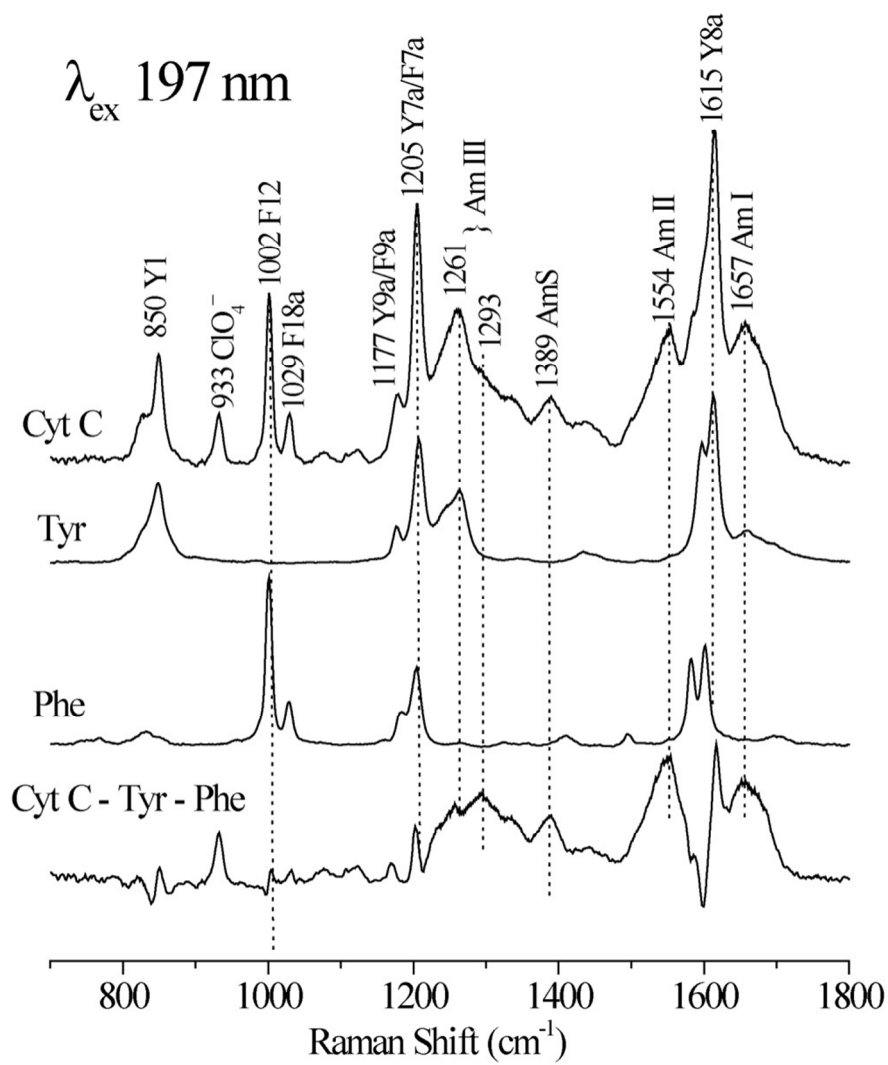

Figure S2. 197-nm excited UVRR spectrum of *hh* cyt c (pH 3.0). For secondary structure analysis the interfering bands from Tyr and Phe are suppressed by subtracting aqueous Tyr and Phe spectra at the appropriate molar concentration. Subtraction is inexact because of the altered cross-sections in the protein, but is sufficient to reliably expose backbone features, particularly in the central 1200-1500  $\text{cm}^{-1}$  region.

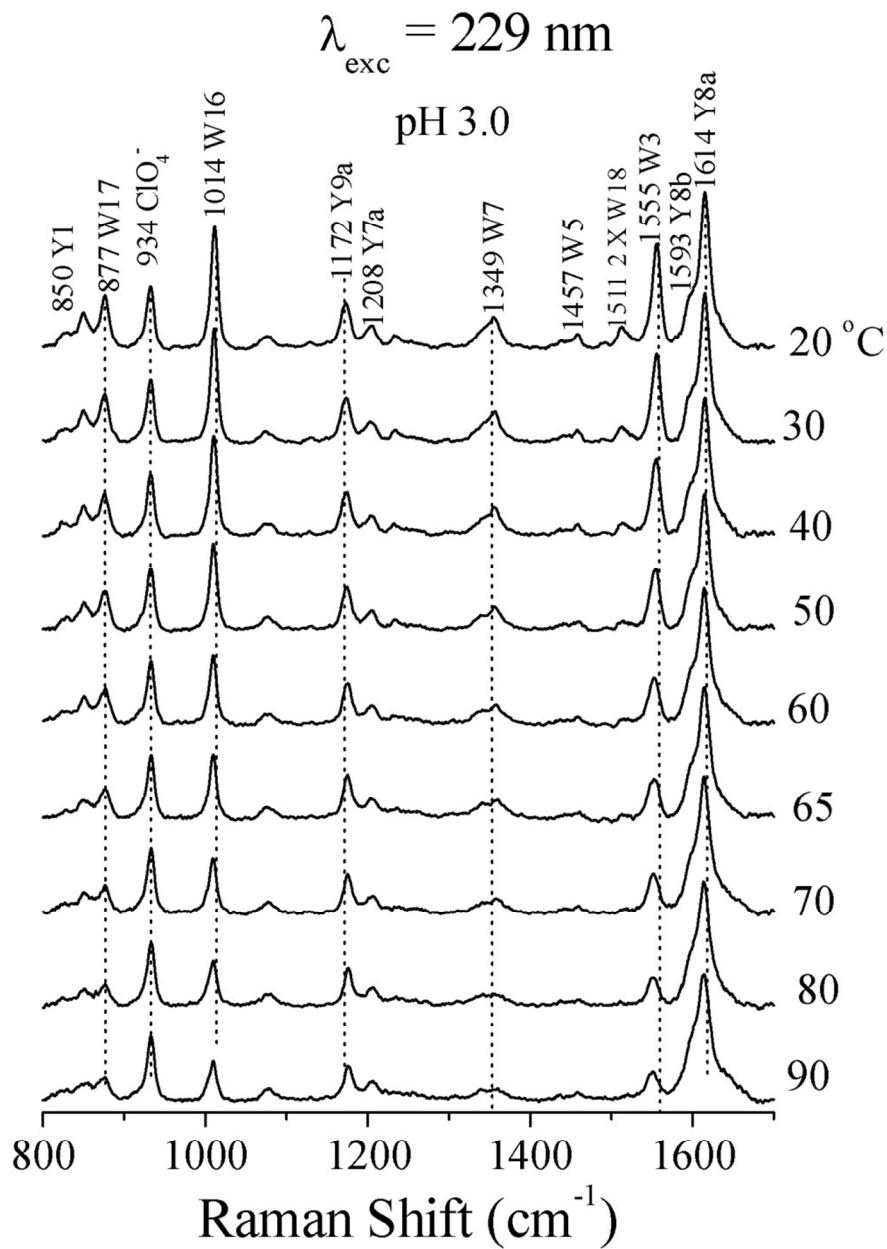

Figure S3. Temperature-dependent, 229 nm-excited UVRR spectra of *hh* cyt *c* at pH 3.0, showing loss of intensity in the signals from Tyr and Trp. Assignments are indicated in the top spectrum.<sup>1,2</sup>

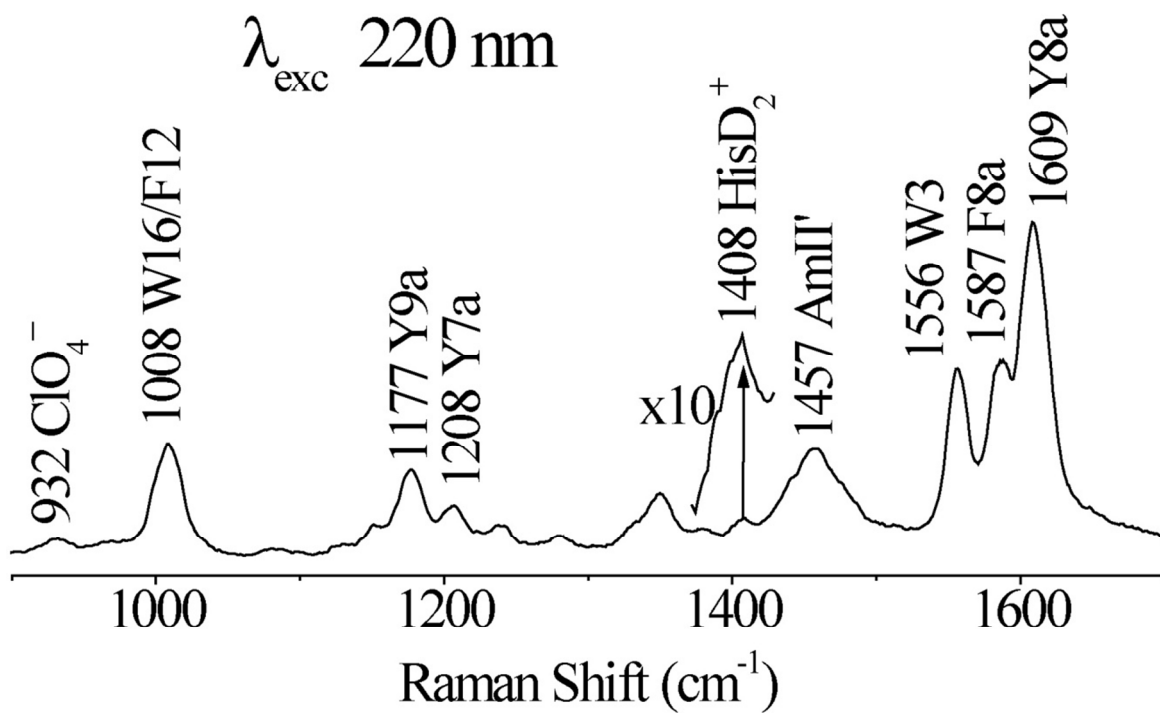

Figure S4. 220 nm-excited UVRR spectrum of *hh* cyt c in  $\text{D}_2\text{O}$ , showing the  $1408 \text{ cm}^{-1}$  HisD<sub>2</sub><sup>+</sup> band.

#### REFERENCES

- (1) Harada, I.; Takeuchi, H. In *Spectroscopy of biological systems*; Clark, R. J. H., Hester, R. E., Eds.; John Wiley: New York, 1986, p 113-175.
- (2) Austin, J. C.; Rodgers, K. R.; Spiro, T. G. *Metallobiochemistry, Part C* **1993**, 226, 374-396.
